# Supplementary material
Source: MDPI journal article supplement (https://www.mdpi.com/1424-8247/14/10/1010)
Supplement: s1 [file s1]

## Supplement 11.

The composition (%) of powdered herbal preparations (HRG80™ and WG™) and their extracts (HRG and WG) used *in vitro* experiments:

|                  | Extract of red ginseng (HRG) | Extract of white ginseng (WG) | Red ginseng Dry powder (HRG80™) | White ginseng Dry powder (WG™) |
|------------------|------------------------------|-------------------------------|---------------------------------|--------------------------------|
| Rg1              | 0.093                        | 0.138                         | 0.023                           | 0.035                          |
| Re               | 0.455                        | 2.695                         | 0.114                           | 0.678                          |
| Rf               | 0.322                        | 0.322                         | 0.081                           | 0.081                          |
| <b>Rb1</b>       | <b>0.183</b>                 | <b>4.250</b>                  | <b>0.046</b>                    | <b>1.069</b>                   |
| Rg2              | 0.000                        | 0.141                         | 0.00                            | 0.035                          |
| Rc               | 1.886                        | 3.402                         | 0.473                           | 0.856                          |
| Rh1              | 0.282                        | 0,00                          | 0.071                           | 0.00                           |
| Rb2              | 0.517                        | 4.309                         | 0.130                           | 1.084                          |
| F1               | 0.019                        | 0.035                         | 0.005                           | 0.009                          |
| Rd               | 1.904                        | 3.810                         | 0.477                           | 0.958                          |
| Rg6              | 0.868                        | 0.058                         | 0.218                           | 0.015                          |
| F2               | 0.524                        | 1.413                         | 0.131                           | 0.355                          |
| Rh4              | 4.356                        | 0.722                         | 1.092                           | 0.182                          |
| <b>Rg3-(S-R)</b> | <b>4.307</b>                 | <b>0.309</b>                  | <b>1.080</b>                    | <b>0.078</b>                   |
| PPT (20-R)       | 0.087                        | 0.014                         | 0.022                           | 0.004                          |
| <b>Rk1</b>       | <b>4.027</b>                 | <b>0.112</b>                  | <b>1.009</b>                    | <b>0.028</b>                   |
| C(k)             | 0,000                        | 0,000                         | 0.00                            | 0.00                           |
| <b>Rg5</b>       | <b>7.534</b>                 | <b>0.031</b>                  | <b>1.888</b>                    | <b>0.008</b>                   |
| Rh2              | 0.924                        | 0.117                         | 0.232                           | 0.029                          |
| Rh3              | 1.817                        | 0.015                         | 0.455                           | 0.004                          |
| 20S-PPT          | 0.061                        | 0.187                         | 0.015                           | 0.047                          |
| PPD              | 0.150                        | 0.073                         | 0.038                           | 0.018                          |
| <b>Total</b>     | <b>30.32</b>                 | <b>22.15</b>                  | <b>7.599</b>                    | <b>5.572</b>                   |

100 g HRG80 powder contains 25.06 g Extract (DER 4 : 1) including 7.6 g of total ginsenosides  
 100 g WG powder contains 25.16 g Extract (DER 4:1) including 5.57 g of total ginsenosides.

Abbreviations of test samples used in vitro experiments:

| Sample name | Concentration ng/ml |
|-------------|---------------------|
| HRG1        | 10000               |
| HRG2        | 1000                |
| HRG3        | 100                 |
| HRG4        | 10                  |
| HRG5        | 0.01                |

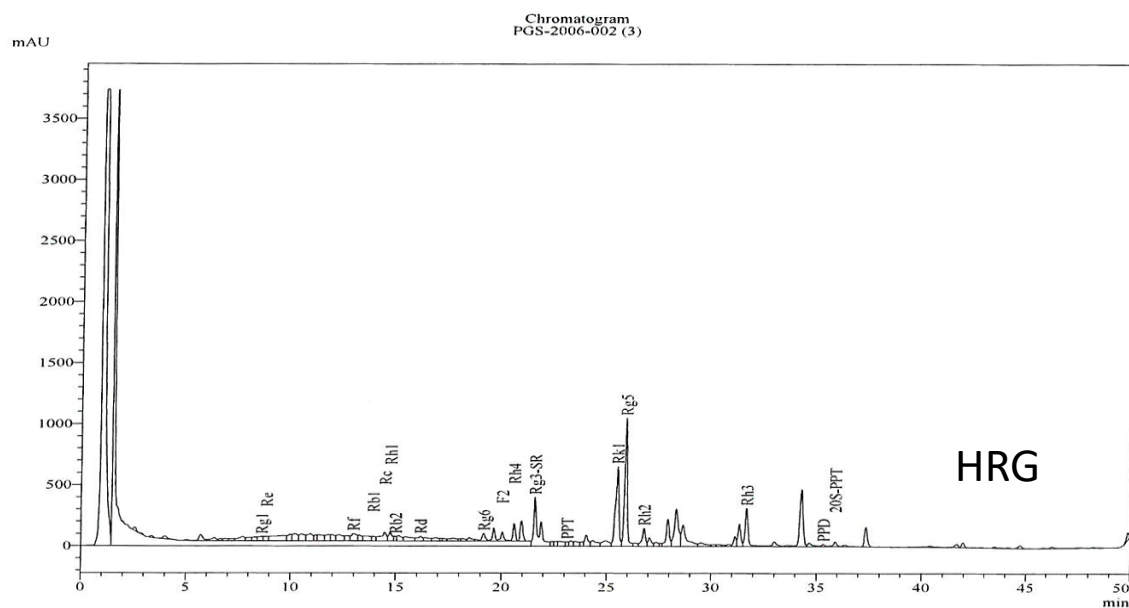

**Figure S1.** HPLC fingerprint.
